# Supplementary material for: Substantial contribution of genetic variation in the expression of transcription factors to phenotypic variation revealed by eRD-GWAS
Source: PubMed Central journal article supplement (PMC5645915; doi:10.1186/s13059-017-1328-6), 2017-10-17
Supplement: 13059_2017_1328_MOESM2_ESM.pdf [file 13059_2017_1328_MOESM2_ESM.pdf]

**Supplemental Materials for: Substantial contribution of genetic variation in the expression of transcription factors to phenotypic variation revealed by eRD-GWAS**

**SUPPLEMENTAL FIGURES:**

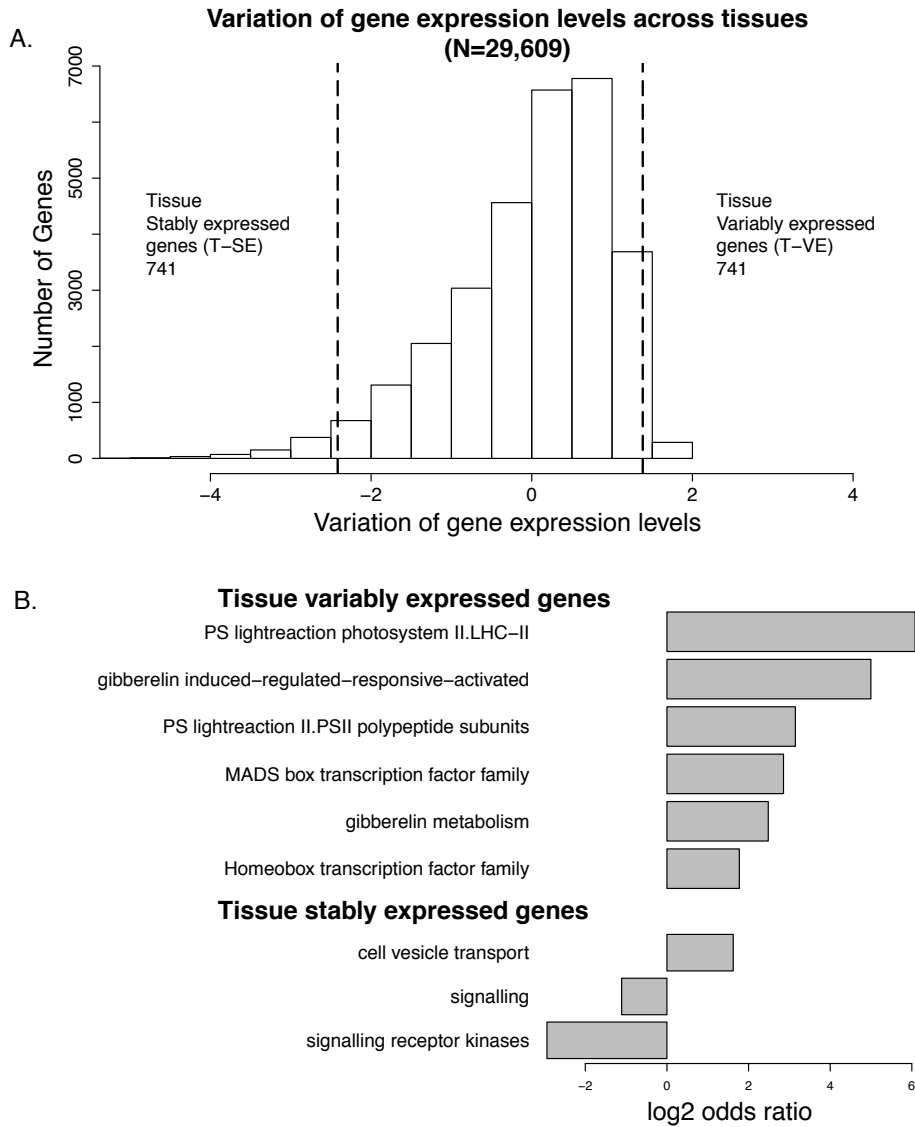

Figure S1. Identification and functional enrichment of T-VE and T-SE genes. a) Histogram of expression variation across tissues; dashed line corresponds to upper and lower 2.5% percentiles of the distribution. b) Functional enrichment of significant categories within T-VE and T-SE genes.

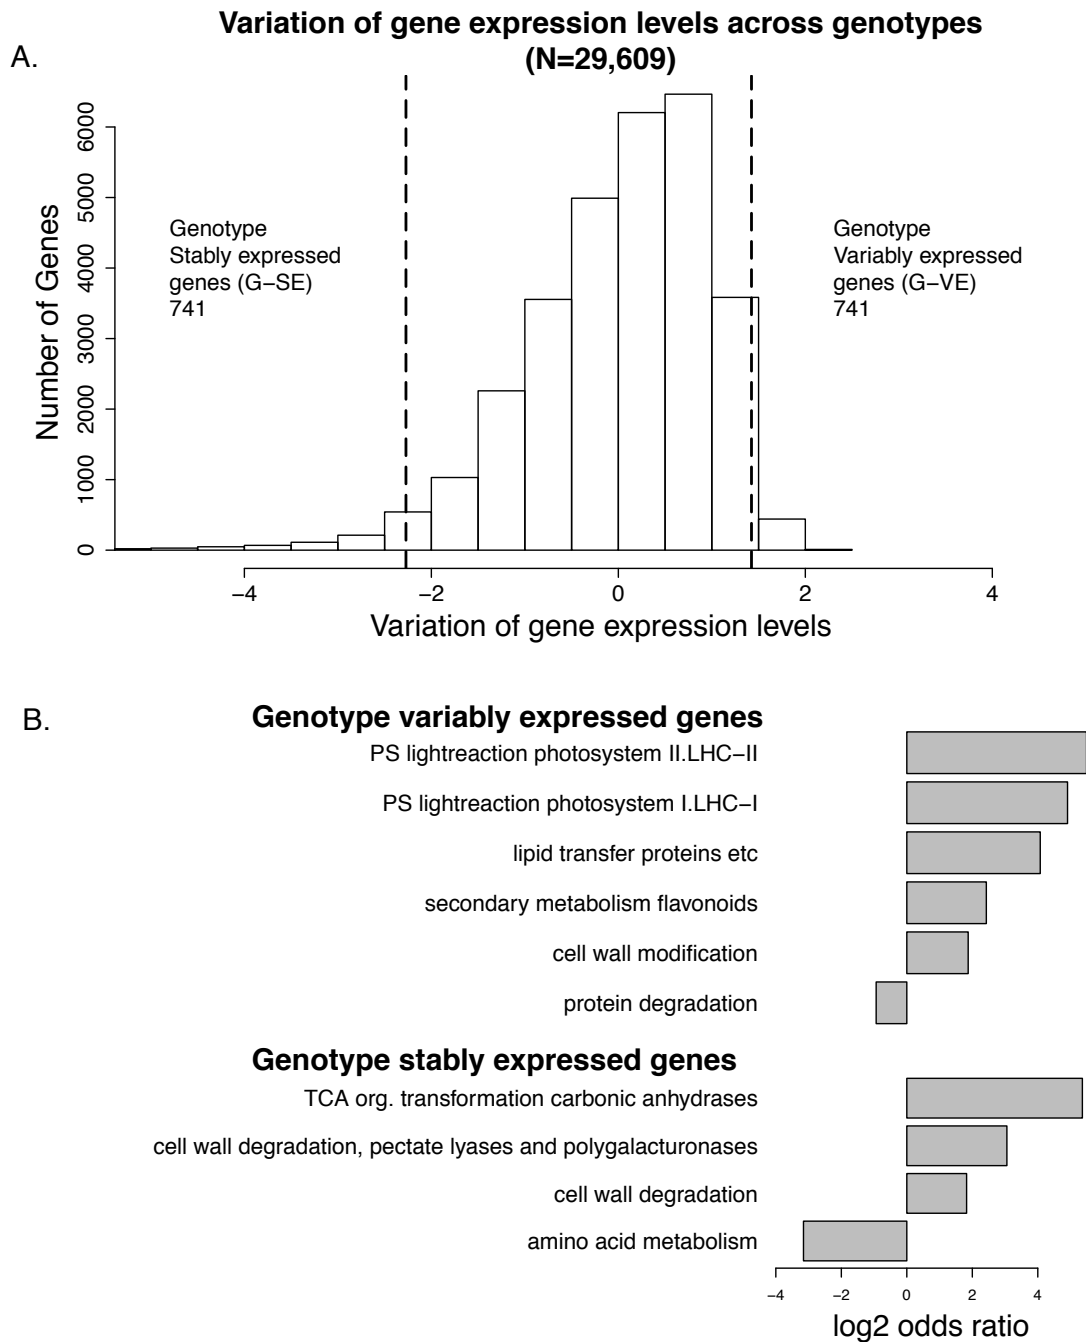

Figure S2. Identification and functional enrichment of G-VE and G-SE genes. a) Histogram of expression variation across tissues; dashed line corresponds to upper and lower 2.5% percentiles of the distribution. b) Functional enrichment of significant categories within G-VE and G-SE genes.

**A. Arabidopsis variation of gene expression levels across genotypes (N=21,915)**

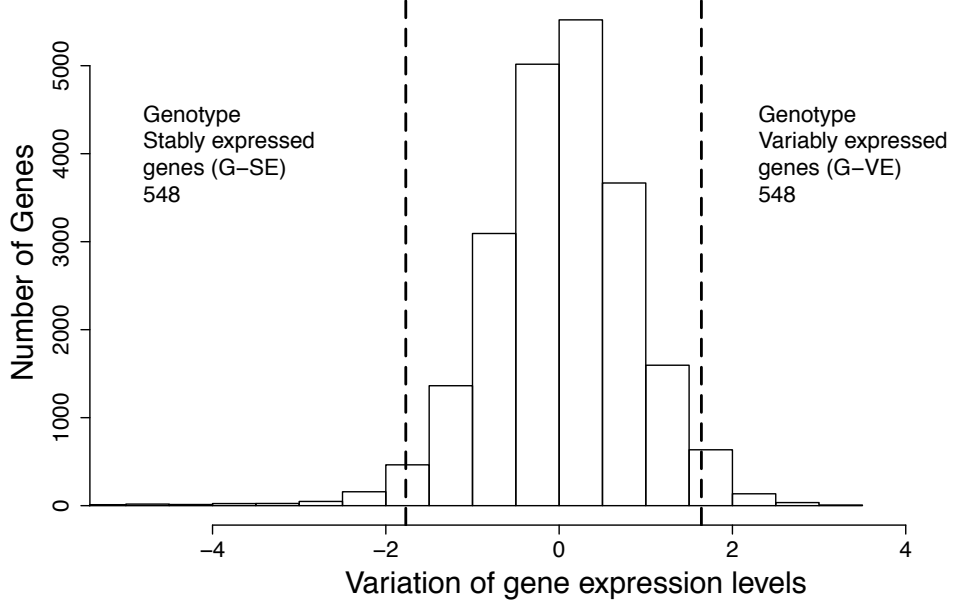

**B. Genotype variably expressed genes**

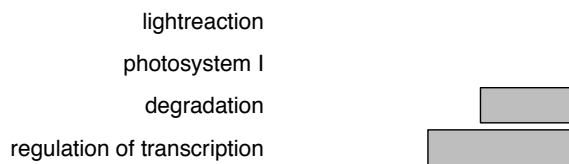

**Genotype stably expressed genes**

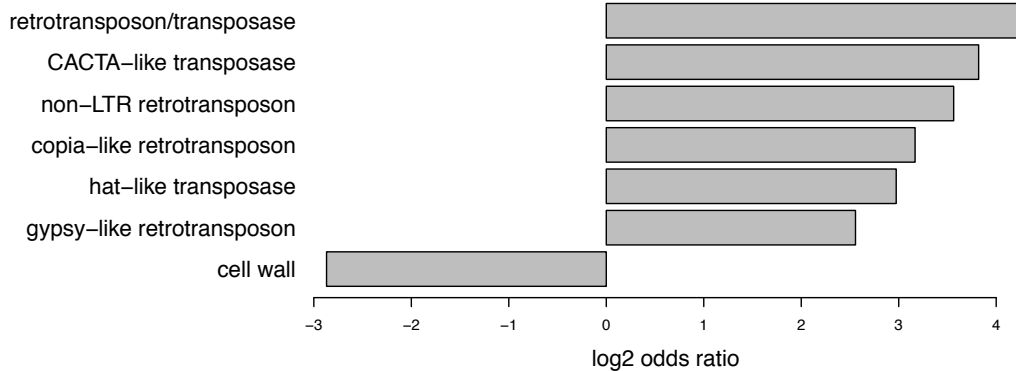

Figure S3. Identification and functional enrichment of G-VE and G-SE genes in Arabidopsis. a) Histogram of expression variation across tissues; dashed line corresponds to upper and lower 2.5% percentiles of the distribution. b) Functional enrichment of significant categories within G-VE and G-SE genes.

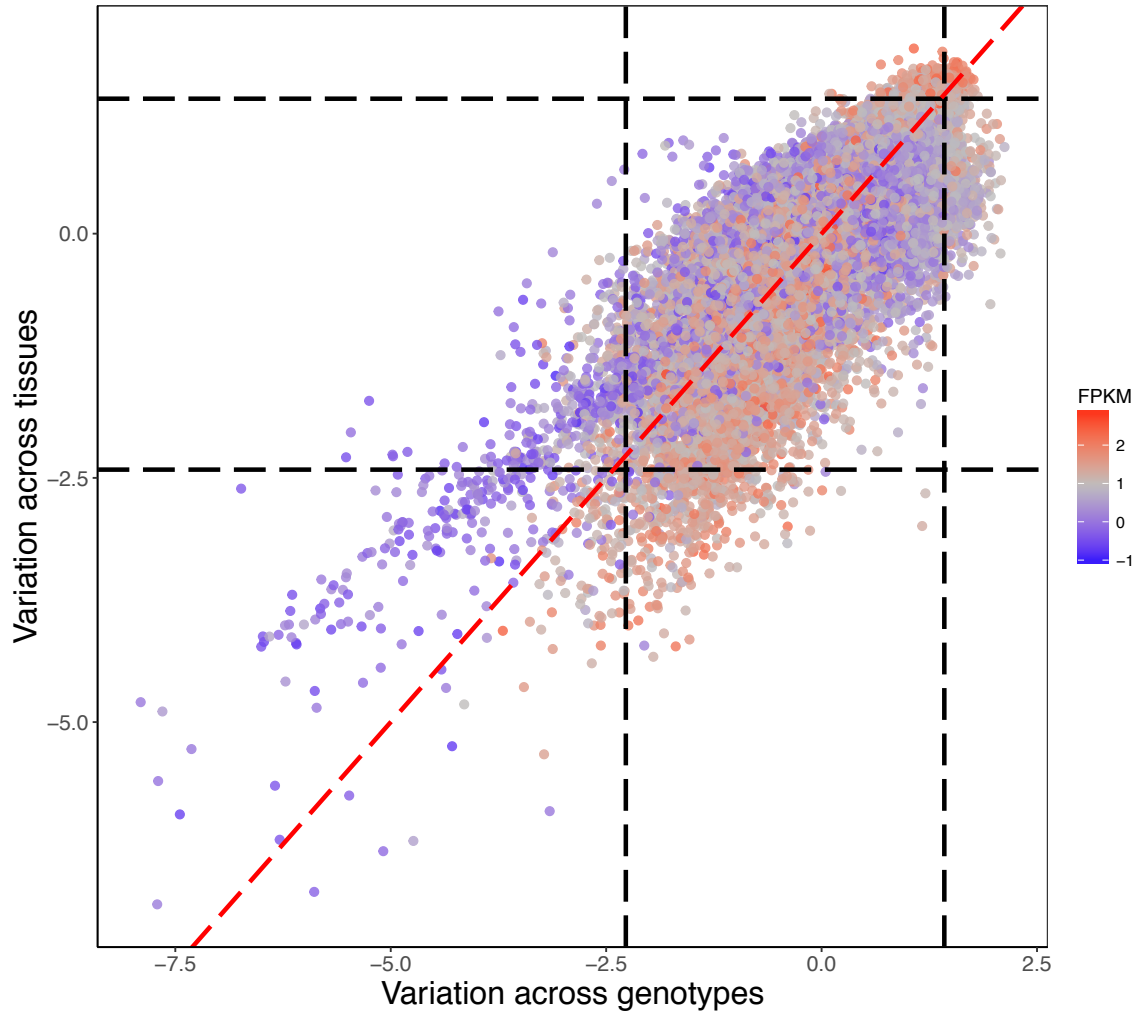

Figure S4. Scatterplot of variation in expression across genotypes and tissues. Colors designate expression levels, with blue the lowest and red the highest; the red dashed line is the diagonal, black dashed lines corresponded to upper and lower 2.5% percentiles for variation in expression.

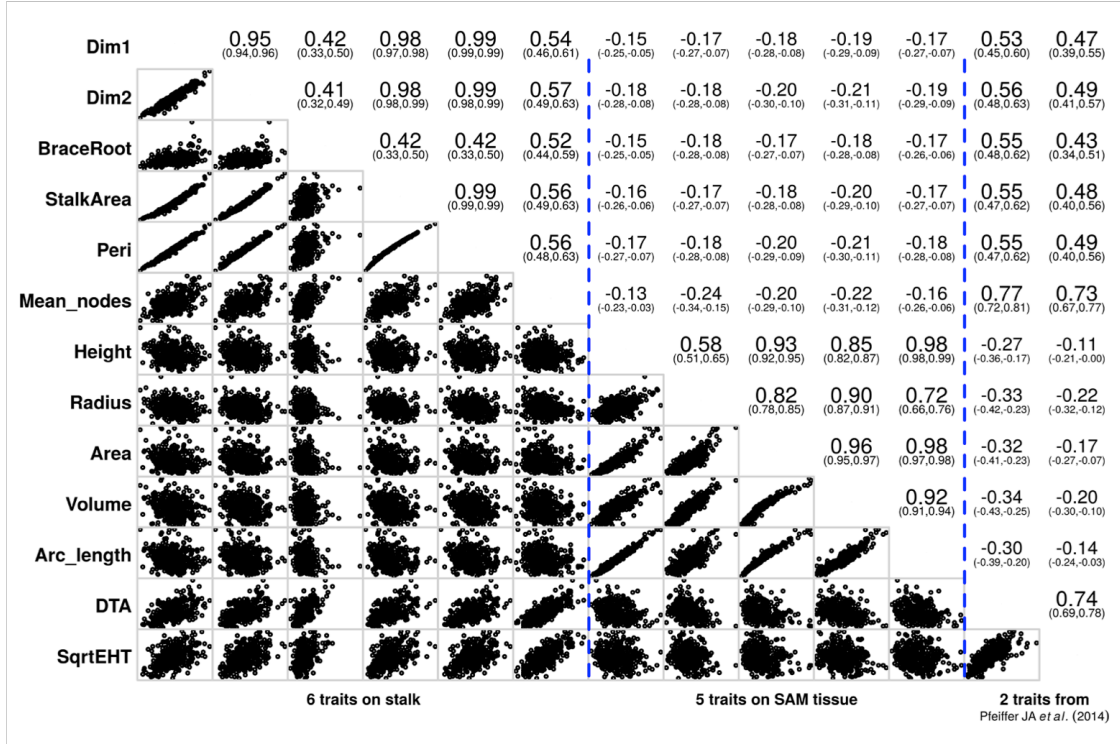

Figure S5. Correlations among 13 traits.



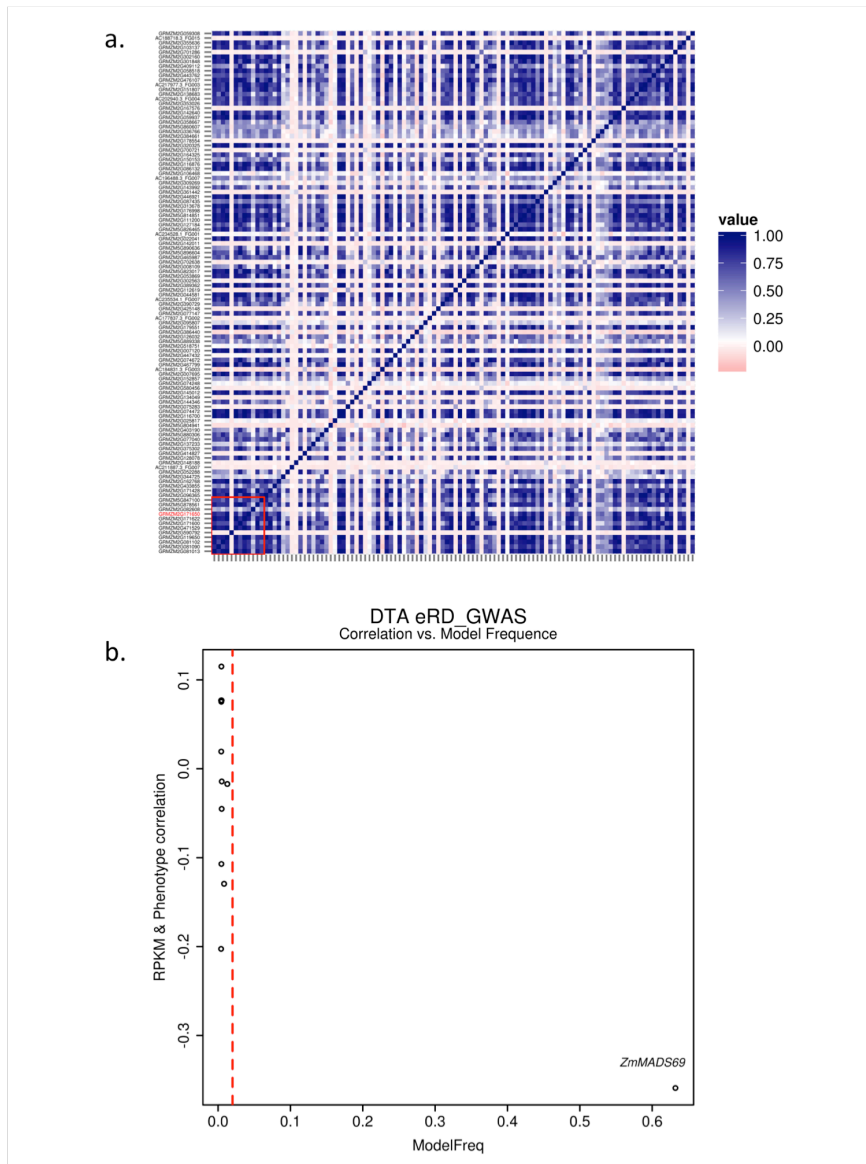

Figure S7. The effect of expression LD on eRD-GWAS. a) A heatmap showing correlation values among RPKM values for 112 genes. The red rectangle is a 1 Mb window centered on the physical position of the *ZmMADS69* gene. The remainder of the figure contains 100 randomly chosen genes. b) Relationship between model frequencies from eRD-GWAS for the DTA trait and the correlation between RPKM values of genes and the DTA trait within the 1 Mb window.

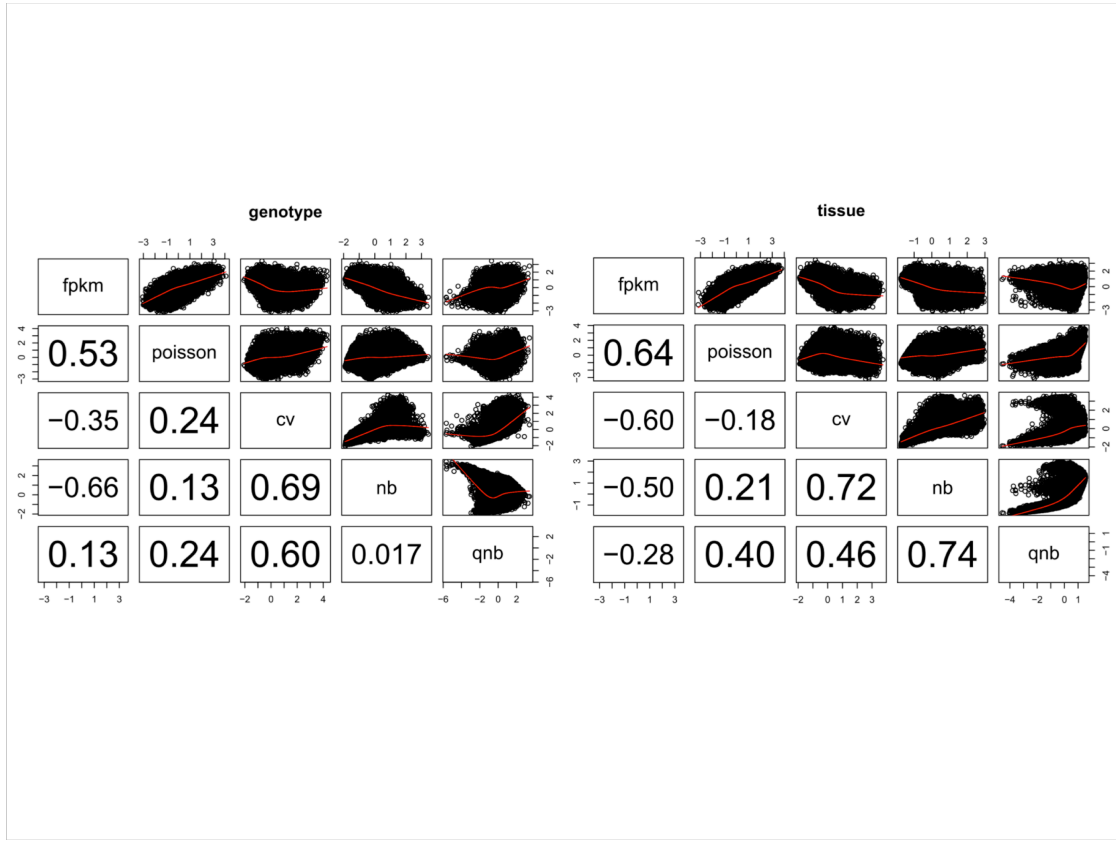

Figure S8. Selection of parameters for measuring expression variation. Pairwise correlations between expression levels (FPKM), the over-dispersion parameter of Poisson (poisson), Coefficient of Variation (cv), dispersion of Negative Binomial models (nb) and over-dispersion parameters of Negative Binomial models (qnb) across genotypes (left panel) and tissues (right panel).
